# Supplementary material for: Framing Effects on Attitudes and Intentions Toward Shark Meat Consumption in Lima, Peru
Source: Frontiers journal article supplement (doi:10.3389/fcosc.2022.807252), 2022-04-01
Supplement: Data_Sheet_1.PDF [file Data_Sheet_1.PDF]

Table S1: Survey

Part 1.

| Question                                                                                                              | Variable name (Excel) | Options                                                                                                                               |
|-----------------------------------------------------------------------------------------------------------------------|-----------------------|---------------------------------------------------------------------------------------------------------------------------------------|
|                                                                                                                       | ID                    | Identification Number                                                                                                                 |
|                                                                                                                       | Condition             | Condition                                                                                                                             |
| How often do you consume seafood?                                                                                     | Often                 | 1 = Never<br>2 = Once a year<br>3 = Less than once a month<br>4 = Once a month<br>5 = Once a week<br>6 = More than once a week        |
| Within the past two months, which of the following fish have you consumed (you can select all the options that apply) | anchovy               | Peruvian anchovy                                                                                                                      |
|                                                                                                                       | tollo                 | Tollo (o toyo), tolo de leche, tolo bebé                                                                                              |
|                                                                                                                       | bonito                | Eastern Pacific bonito                                                                                                                |
|                                                                                                                       | makoshark             | Shortfin mako shark (tollo diamante)                                                                                                  |
|                                                                                                                       | blueshark             | Blue shark or blue tolo                                                                                                               |
|                                                                                                                       | caballa               | Chub mackerel                                                                                                                         |
|                                                                                                                       | jurel                 | Jack Mackerel                                                                                                                         |
|                                                                                                                       | lisa                  | Flathead grey mullet                                                                                                                  |
|                                                                                                                       | marlin                | Marlin                                                                                                                                |
|                                                                                                                       | flounder              | Flounder                                                                                                                              |
|                                                                                                                       | corvina               | Corvina drum                                                                                                                          |
|                                                                                                                       | chita                 | Peruvian grunt                                                                                                                        |
|                                                                                                                       | tunaCan               | Tuna, canned                                                                                                                          |
|                                                                                                                       | tuna                  | Tuna, fillet                                                                                                                          |
|                                                                                                                       | salmon                | Salmon                                                                                                                                |
|                                                                                                                       | tilapia               | Tilapia                                                                                                                               |
|                                                                                                                       | NotKnow               | I don't know                                                                                                                          |
|                                                                                                                       | OtherFi               | Other                                                                                                                                 |
|                                                                                                                       | OtherSp               | Tell us which one:                                                                                                                    |
| Year of birth                                                                                                         | Birth                 | Dropdown menu                                                                                                                         |
| Highest completed level of education:                                                                                 | Edu                   | 1 = Elementary<br>2 = High-school<br>3 = Technical/Post-Secondary Institution<br>4 = University<br>5 = None of the above<br>6 = Other |
|                                                                                                                       | Edu.other             | Free response                                                                                                                         |
| Gender                                                                                                                | Gender                | 1 = Male<br>2 = Female                                                                                                                |

## Part 2. Manipulation check

| Question                                                                                                                                                                                              | Variable name (Excel) | Options                                                                                                                          |
|-------------------------------------------------------------------------------------------------------------------------------------------------------------------------------------------------------|-----------------------|----------------------------------------------------------------------------------------------------------------------------------|
| Mercury is bad for my health.                                                                                                                                                                         | PSin1                 | 1 = completely disagree<br>2 = slightly disagree                                                                                 |
| Ingesting mercury in food is more serious for ones' health than most people realize.                                                                                                                  | PSin2                 | 3 = neither agree nor disagree<br>4 = slightly agree<br>5 = completely agree                                                     |
| If I eat shark or tollo, I will be eating mercury.                                                                                                                                                    | PSuin1                | 1 = completely disagree<br>2 = slightly disagree<br>3 = neither agree nor disagree                                               |
| When eating shark or tollo, I am also eating mercury.                                                                                                                                                 | PSuin2                | 4 = slightly agree<br>5 = completely agree                                                                                       |
| Sharks and tollos are important for a healthy marine ecosystem.                                                                                                                                       | PSex1                 | 1 = completely disagree<br>2 = slightly disagree<br>3 = neither agree nor disagree                                               |
| If sharks and tollos disappeared from the ocean, the consequences for the ocean would be worse than most people realize.                                                                              | PSex2                 | 4 = slightly agree<br>5 = completely agree                                                                                       |
| Consuming shark and tollo meat will cause sharks and tollos to disappear from the ocean.                                                                                                              | PSuex1                | 1 = completely disagree<br>2 = slightly disagree<br>3 = neither agree nor disagree                                               |
| Eating sharks and tollo will contribute to the reduction of their numbers.                                                                                                                            | PSuex2                | 4 = slightly agree<br>5 = completely agree                                                                                       |
| Eating popular fish (like Peruvian anchovy, Jack mackerel, Pacific chub mackerel, Eastern Pacific bonito, Chilean silverside, and Flathead grey mullet) would keep people from eating mercury.        | REinP1                | 1 = completely disagree<br>2 = slightly disagree<br>3 = neither agree nor disagree<br>4 = slightly agree<br>5 = completely agree |
| If people eat popular fish (like Peruvian anchovy, Jack mackerel, Pacific chub mackerel, Eastern Pacific bonito, Chilean silverside, and Flathead grey mullet) they would be avoiding eating mercury. | REinP2                |                                                                                                                                  |
| Avoiding shark and tollo meat would keep people from eating mercury.                                                                                                                                  | REinS1                | 1 = completely disagree<br>2 = slightly disagree<br>3 = neither agree nor disagree                                               |
| If people avoid eating shark and tollo, they would be avoiding eating mercury.                                                                                                                        | ReinS2                | 4 = slightly agree<br>5 = completely agree                                                                                       |
| Buying pop. fish would help protect sharks, tollos, & the ocean.                                                                                                                                      | REexP1                | 1 = completely disagree<br>2 = slightly disagree<br>3 = neither agree nor disagree                                               |
| If people eat pop. fish they would be avoiding harming sharks, tollos & the ocean.                                                                                                                    | REexP2                | 4 = slightly agree<br>5 = completely agree                                                                                       |
| If people avoid buying shark and tollo meat, it would help them protect sharks, tollos, and the ocean.                                                                                                | REexS1                | 1 = completely disagree<br>2 = slightly disagree<br>3 = neither agree nor disagree                                               |
| If people eat shark & tollo, they would be harming sharks, tollos, and the ocean.                                                                                                                     | REexS2                | 4 = slightly agree<br>5 = completely agree                                                                                       |

## Part 3. Attitudes and Intentions

| Question                                                                                                                                                                      | Variable name (Excel) | Options                                                                                                                                             |
|-------------------------------------------------------------------------------------------------------------------------------------------------------------------------------|-----------------------|-----------------------------------------------------------------------------------------------------------------------------------------------------|
| Eating shark (or tollo) is:                                                                                                                                                   | shark.1               | 1 = negative<br>2 = slightly negative<br>3 = neutral: not negative or positive<br>4 = slightly positive<br>5 = positive                             |
|                                                                                                                                                                               | shark.2               | 1 = bad<br>2 = slightly bad<br>3 = neutral: not bad or good<br>4 = slightly good<br>5 = good                                                        |
|                                                                                                                                                                               | shark.3               | 1 = irresponsible<br>2 = slightly irresponsible<br>3 = neutral: not irresponsible bad or responsible<br>4 = slightly responsible<br>5 = responsible |
| Eating popular fish (like Peruvian anchovy, Jack mackerel, Pacific chub mackerel, Eastern Pacific bonito, Chilean silverside, and Flathead grey mullet) is:                   | pop.1                 | 1 = negative<br>2 = slightly negative<br>3 = neutral: not negative or positive<br>4 = slightly positive<br>5 = positive                             |
|                                                                                                                                                                               | pop.2                 | 1 = bad<br>2 = slightly bad<br>3 = neutral: not bad or good<br>4 = slightly good<br>5 = good                                                        |
|                                                                                                                                                                               | pop.3                 | 1 = irresponsible<br>2 = slightly irresponsible<br>3 = neutral: not irresponsible bad or responsible<br>4 = slightly responsible<br>5 = responsible |
| In the future, I will eat shark (or tollo)                                                                                                                                    | int.shark1            | 1 = completely disagree<br>2 = slightly disagree<br>3 = neither agree nor disagree<br>4 = slightly agree<br>5 = completely agree                    |
| I plan to include shark (or tollo) in my diet                                                                                                                                 | int.shark2            |                                                                                                                                                     |
| In the future, I will eat popular fish (like Peruvian anchovy, Jack mackerel, Pacific chub mackerel, Eastern Pacific bonito, Chilean silverside, and Flathead grey mullet)    | int.pop1              |                                                                                                                                                     |
| I plan to include popular fish (like Peruvian anchovy, Jack mackerel, Pacific chub mackerel, Eastern Pacific bonito, Chilean silverside, and Flathead grey mullet) in my diet | int.pop2              |                                                                                                                                                     |
