# Supplementary material for: Framing Effects on Attitudes and Intentions Toward Shark Meat Consumption in Lima, Peru
Source: Frontiers journal article supplement (doi:10.3389/fcosc.2022.807252), 2022-04-01
Supplement: Table_1.XLSX [file Table_1.XLSX]

## Sheet: Data
ID	Condition	Often	anchovy	tollo	bonito	makoshark	blueshark	caballa	jurel	lisa	marlin	flounder	corvina	chita	tunaCan	tuna	salmon	tilapia	NotKnow	OtherFi	OtherSp	Born	Edu	Edu.other	Gender	PSin1	PSin2	PSuIn1	PSuIn2	PSex1	PSex2	PSuEx1	PSuEx2	REinP1	REinP2	REinS1	REinS2	REexP1	REexP2	REexS1	REexS2	shark.1	shark.2	shark.3	pop.1	pop.2	pop.3	int.shark1	int.shark2
1	Condition1a	5	1	2	1										1	1						1998	4		1	5	5	5	5	5	5	5	5	3	2	2	2	4	4	4	4	1	1	1	4	4	4	1	1
2	Condition1a	6	1	2	1			1	1	1		1	1		1	1	1					1997	3		1	4	3	1	1	5	5	5	1	5	5	5	5	5	5	5	5	1	1	1	5	5	5	1	1
3	Condition1a	5	1	1	1					1					1		1					2000	4		1	5	5	5	4	3	4	4	5	5	5	5	4	5	2	3	3	3	2	2	5	5	4	2	2
4	Condition1a	6	1	2	1			1	1	1		1	1		1	1	1					1983	4		1	5	5	5	5	4	3	5	5	5	5	5	5	5	5	5	5	1	1	1	5	5	5	1	1
5	Condition1a	6	1	1				1					1			1		1				1993	4		1	5	5	4	5	5	5	5	4	5	5	5	5	5	5	5	5	1	1	1	5	5	5	1	2
6	Condition1a	5		2					1						1		1					1998	4		1	5	5	5	5	4	5	5	5	5	5	5	5	5	5	5	5	1	1	1	5	5	5	1	1
7	Condition1a	6		2	1				1					1	1	1		1				1981	3		1	5	5	1	5	5	5	5	5	5	5	5	5	5	5	5	5	3	3	3	5	5	5	5	5
8	Condition1a	6	1	1	1			1	1			1	1		1	1		1		1	Mojarra, life	1987	4		1	5	5	4	4	5	4	3	3	2	4	4	3	3	4	3	3	3	3	2	4	4	4	3	2
9	Condition1a	5		2	1				1	1			1		1	1						1976	4		1	5	5	5	5	5	5	4	5	4	4	5	5	5	4	5	5	1	1	1	5	5	5	1	1
10	Condition1a	5		2	1			1							1							1980	4		1	5	5	5	5	5	5	5	5	5	5	5	5	5	5	5	5	1	1	1	5	5	5	1	1
11	Condition1a	5		1	1	1		1							1	1						1994	4		2	5	5	5	5	5	5	5	5	4	4	4	4	5	5	5	5	1	1	1	5	5	4	3	2
12	Condition1a	5	1	2	1											1						1980	2		2	5	5	5	5	3	4	5	4	5	5	5	5	4	5	5	5	1	1	1	5	5	5	1	1
13	Condition1a	5		2									1		1			1				1986	4		2	5	5	5	5	5	5	5	5	5	5	5	5	5	5	5	5	1	1	1	5	5	5	1	1
14	Condition1a	4		2	1				1						1							1998	4		2	5	5	5	5	4	5	5	5	5	5	5	5	5	5	5	5	1	1	1	5	5	5	1	1
15	Condition1a	6		2	1										1		1					1994	4		2	5	5	5	5	5	5	5	5	5	5	5	5	5	5	5	5	1	1	1	5	5	5	1	1
16	Condition1a	5		2	1			1	1			1			1	1						1988	4		2	5	5	5	5	1	4	4	4	4	4	5	5	5	5	3	3	1	2	2	2	1	1	1	1
17	Condition1a	6		2				1	1	1		1			1		1			1	Cojinova, Merluza, Pejerrey	1978	4		2	5	5	5	5	4	4	4	4	5	5	5	5	5	5	4	4	1	1	1	5	5	5	1	1
18	Condition1a	5		2	1										1			1				1977	4		2	5	5	5	5	5	5	5	5	5	5	5	5	5	5	5	5	1	1	1	5	5	5	1	1
19	Condition1a	6		2	1				1	1					1					1	Merluza	1995	4		2	5	4	4	4	4	4	4	4	4	3	3	3	4	4	4	4	1	1	1	5	5	4	1	1
20	Condition1a	5	1	2	1				1			1			1					1	Truchas	1997	4		2	5	5	5	5	5	4	4	4	5	5	5	5	5	5	5	5	1	1	1	5	5	5	1	1
21	Condition1b	4	1	2				1	1				1									1996	4		1	5	5	5	4	5	5	5	5	5	4	5	4	5	5	5	5	2	2	1	5	4	4	1	2
22	Condition1b	4	1	2	1																	1968	3		1	5	1	1	1	1	1	1	1	1	1	1	1	1	1	1	1	1	1	1	5	5	5	1	1
23	Condition1b	5		2	1																	1989	4		1	5	5	5	5	5	5	5	5	5	5	5	5	5	5	5	5	1	1	1	5	5	5	1	1
24	Condition1b	5		2	1																	1999	3		1	5	5	5	5	5	5	4	4	5	5	5	5	5	5	5	5	1	3	1	1	3	3	3	4
25	Condition1b	5		2	1													1				1996	3		1	1	3	3	4	4	3	5	1	4	3	2	3	2	1	1	1	3	2	2	1	5	5	3	2
26	Condition1b	6	1	2	1			1	1	1	1		1		1	1		1				1985	4		1	5	5	5	5	5	5	5	5	5	5	5	5	5	5	5	5	1	1	1	5	5	5	1	1
27	Condition1b	4		2	1					1					1							1976	3		1	5	5	5	5	5	5	5	4	5	5	5	5	5	5	5	4	1	1	1	5	5	4	1	1
28	Condition1b	5		2	1				1	1					1							1978	4		1	5	5	5	5	5	5	5	5	5	5	5	5	5	5	5	5	1	1	1	5	5	5	1	1
29	Condition1b	5		2				1	1													1990	6	Idiomas	1	5	5	5	5	5	5	5	5	5	5	5	5	4	3	5	5	1	1	1	5	5	5	1	1
30	Condition1b	5		2	1				1	1												1990	3		2	5	5	5	5	5	5	5	5	3	3	4	4	5	5	5	5	1	1	1	5	5	5	1	1
31	Condition1b	4		2	1			1	1						1							1998	4		2	5	5	5	5	4	5	5	5	5	5	5	5	5	5	5	5	1	1	1	5	5	5	1	1
32	Condition1b	5		2	1				1													1986	3		2	5	5	5	5	5	5	5	5	5	5	5	5	4	5	5	5	1	1	1	5	5	5	1	1
33	Condition1b	6		1	1			1	1													1969	5		2	5	5	5	5	5	5	5	5	5	5	5	5	5	5	5	5	1	1	1	5	5	5	1	1
34	Condition1b	6		2	1			1	1	1					1							1984	4		2	5	5	5	5	5	5	5	5	5	5	5	5	5	5	5	5	1	1	1	5	5	5	1	1
35	Condition1b	5		2	1			1	1					1	1		1					1987	4		2	5	5	5	5	5	3	5	4	5	4	4	4	4	4	4	4	1	2	2	4	4	4	1	1
36	Condition1b	6	1	2	1			1						1	1	1	1	1		1	pejerrey	1998	3		2	5	5	5	5	5	5	5	5	5	5	5	5	5	5	5	5	1	1	1	5	5	5	1	1
37	Condition1b	5		2	1										1		1					1974	4		2	5	5	5	5	4	5	5	5	5	5	5	5	5	5	5	5	1	1	1	5	5	5	1	1
38	Condition1b	4	1	2	1			1							1	1	1					1997	4		2	5	5	5	5	5	4	5	5	5	5	5	5	4	5	5	5	2	2	1	4	4	3	2	2
39	Condition2	5		2	1				1						1							1989	2		1	5	5	5	5	5	5	5	5	5	5	5	5	5	5	5	5	1	1	1	5	5	5	1	1
40	Condition2	6	1	2	1			1							1			1				1986	2		1	5	5	4	4	5	5	4	5	5	5	5	5	5	5	5	5	1	1	1	5	5	5	1	1
41	Condition2	5	1	2	1										1							2000	4		1	5	5	5	5	5	5	5	5	4	4	4	4	4	4	4	4	1	1	2	5	5	4	1	1
42	Condition2	5		2	1			1							1	1				1	Ojo de uva	1984	4		1	5	5	5	5	2	5	4	5	1	1	1	5	3	3	5	5	1	2	2	5	5	3	1	1
43	Condition2	5		1	1			1	1					1	1	1	1					1993	4		1	3	1	3	3	5	4	4	4	3	4	4	4	3	3	4	3	2	2	2	5	4	5	2	1
44	Condition2	4		2	1										1					1	Pejerrey	1989	6	MBA	1	4	5	4	4	4	5	4	5	3	4	4	4	4	4	4	4	1	1	1	5	5	5	2	1
45	Condition2	6		1	1				1							1						1950	4		1	5	5	4	4	3	2	2	2	4	4	4	4	3	3	3	3	3	3	3	5	5	4	4	3
46	Condition2	6		1			1															1999	4		1	4	5	4	4	5	4	4	3	5	5	3	4	4	5	4	5	3	3	2	4	4	4	3	3
47	Condition2	5		1	1	1			1						1	1						1991	4		1	5	5	5	5	1	1	4	4	4	5	4	5	5	5	5	4	1	1	1	5	5	5	1	1
48	Condition2	5	1	2	1										1							1999	2		1	5	5	5	5	4	5	3	4	5	5	5	5	5	5	5	5	1	1	1	5	5	5	2	2
49	Condition2	5		2	1			1	1						1	1						1980	4		1	5	5	5	5	5	5	3	5	5	5	5	5	4	4	5	5	1	1	1	5	5	5	1	1
50	Condition2	5		1		1			1						1			1				1986	4		1	5	5	5	5	4	4	4	4	5	5	5	5	4	4	4	3	1	1	1	5	5	5	1	1
51	Condition2	5		1				1			1		1		1	1						1988	4		1	5	5	5	5	3	3	3	4	5	5	5	5	3	3	4	3	2	2	2	5	5	5	1	1
52	Condition2	5		2	1			1		1					1	1	1					1994	4		1	5	5	5	5	3	3	4	3	5	5	5	5	4	4	4	4	1	1	1	5	5	5	1	1
53	Condition2	5	1	1	1	1	1	1	1	1	1	1	1	1	1	1	1	1	1	1	carachama	1988	2		1	5	5	5	5	4	5	5	5	5	5	5	5	5	5	5	5	1	1	1	5	5	5	1	1
54	Condition2	6	1	2	1			1	1						1							1975	4		1	5	5	5	5	5	5	5	5	5	5	5	5	5	5	5	5	1	1	1	5	5	5	1	1
55	Condition2	5		2	1				1	1					1	1						1990	4		2	5	5	5	5	4	2	3	2	5	5	4	4	5	4	5	5	1	1	2	5	5	5	2	2
56	Condition2	6	1	2	1			1	1	1		1	1		1	1		1				1980	4		2	3	3	3	3	4	3	3	3	3	3	3	3	3	3	3	3	3	3	3	5	5	5	4	3
57	Condition2	5	1	2	1			1	1				1							1	Merluza	1979	4		2	5	5	5	5	5	5	5	5	4	4	5	5	5	5	5	5	1	1	2	5	5	5	1	1
58	Condition2	5	1	1	1			1	1				1									1993	4		2	5	5	4	5	4	5	2	2	5	5	5	5	4	4	4	4	2	2	2	5	5	5	2	2
59	Condition2	4	1	2					1						1		1					1993	4		2	5	5	5	5	5	4	5	5	4	4	4	5	5	4	4	5	1	1	1	4	3	2	1	1
60	Condition2	6		2	1			1							1			1				1991	4		2	5	5	5	5	5	5	5	5	5	5	5	5	5	5	5	5	1	1	1	5	5	5	1	1
61	Condition2	4		2	1				1						1							1995	3		2	1	1	5	5	5	5	3	4	5	5	5	5	5	5	5	5	1	1	1	5	5	5	1	1
62	Condition2	4		2	1				1						1							1988	3		2	5	5	5	5	3	4	4	4	5	5	5	5	5	5	5	5	1	1	1	5	5	5	1	1
63	Condition2	6		2	1												1					1983	3		2	5	4	4	4	4	4	3	3	4	4	4	4	4	4	4	4	1	1	1	5	5	5	1	1
64	Condition2	4		2											1					1	trucha	1973	4		2	5	5	5	5	3	4	4	4	5	5	5	5	5	5	5	5	1	1	1	5	5	5	1	1
65	Condition2	5		2	1																	2000	4		2	3	3	3	3	3	3	3	3	3	3	3	3	3	3	3	3	2	2	2	4	4	4	2	2
66	Condition2	5		1	1	1		1	1			1	1	1	1	1		1				1991	4		2	5	5	5	5	4	4	4	4	5	5	5	5	3	3	3	3	1	1	1	4	4	4	1	1
67	Condition2	5		1	1	1									1							1979	3		2	5	5	4	5	5	2	2	2	4	3	5	5	4	5	5	5	1	1	2	5	5	5	4	2
68	Condition2	6		2	1			1	1	1			1		1							1991	4		2	5	5	5	5	5	5	5	5	5	5	5	5	5	5	5	1	1	1	1	5	5	5	1	1
69	Condition2	6		2	1				1						1	1						1999	2		2	5	5	5	5	5	4	5	4	5	5	5	5	5	5	5	5	1	1	1	5	5	5	1	1
70	Condition2	5	1	2																		1974	4		2	2	3	3	2	2	2	3	1	2	2	3	2	3	4	4	2	2	3	2	3	4	2	2	4
71	Condition2	6	1	2	1			1								1	1	1				1999	4		2	5	5	5	5	5	5	5	5	5	5	5	5	5	5	5	5	1	1	1	5	5	5	1	1
72	Condition3	4	1	2				1	1													1977	3		1	4	5	3	4	4	4	4	4	3	3	3	3	3	3	3	3	4	4	4	4	4	4	4	4
73	Condition3	6		2	1			1	1						1		1	1				1994	4		1	5	5	4	4	4	5	5	5	4	4	5	5	5	5	5	4	2	2	2	4	4	4	2	1
74	Condition3	6	1	1	1			1	1						1	1		1				1993	4		1	5	4	3	3	4	4	4	4	4	4	4	4	5	5	4	4	2	2	2	4	4	4	2	2
75	Condition3	5		2	1																	1977	3		1	5	5	1	1	5	5	5	5	5	5	5	5	5	5	5	5	3	3	3	5	5	5	2	2
76	Condition3	6	1	2	1			1	1			1	1		1		1					1998	4		1	5	5	3	3	4	4	5	5	2	2	4	4	5	4	5	5	1	1	1	4	5	4	1	1
77	Condition3	6		2					1			1	1		1	1	1					1996	2		1	5	5	4	4	5	5	5	5	5	5	5	5	5	5	5	5	1	1	1	5	5	5	1	1
78	Condition3	5		2	1				1	1					1							1999	3		1	5	5	3	3	3	4	3	4	2	2	2	2	3	2	2	3	2	2	2	3	3	3	2	2
79	Condition3	5		2	1			1	1			1			1							1977	4		1	5	5	3	3	5	5	5	5	5	5	5	5	5	5	5	5	1	1	1	5	5	5	1	1
80	Condition3	4		2	1										1			1				1973	4		1	5	5	4	4	5	5	5	5	5	5	3	3	5	5	5	5	1	1	1	5	5	5	1	1
81	Condition3	6	1	2	1																	1994	3		1	5	5	3	3	4	4	5	5	3	3	2	4	5	5	4	4	1	2	1	5	5	5	1	1
82	Condition3	6	1	2	1			1							1		1	1				1982	3		1	5	5	3	5	3	4	4	5	5	5	4	4	4	4	4	4	1	1	1	5	5	5	1	1
83	Condition3	6	1	2	1				1						1	1						1980	4		1	5	5	4	3	4	5	5	5	4	5	4	4	5	5	5	5	1	1	1	5	5	5	1	1
84	Condition3	5		2	1			1	1	1					1					1	Pejerrey	1992	4		1	5	5	3	3	5	5	5	1	3	3	3	4	5	5	5	5	1	2	1	5	5	4	1	1
85	Condition3	6	1	2	1				1	1					1	1				1	Merluza	1989	4		1	5	5	5	5	5	5	5	5	5	5	5	5	5	5	5	5	1	1	1	5	5	5	1	1
86	Condition3	5		2	1				1							1						1977	4		1	5	5	4	4	5	5	4	5	4	4	4	4	5	5	5	5	2	2	1	5	5	5	2	2
87	Condition3	5		2	1				1			1			1		1					1986	4		1	5	5	5	5	5	5	5	5	5	5	5	5	5	5	5	5	2	1	1	5	5	5	1	1
88	Condition3	5	1	2	1				1	1						1	1					1983	4		1	5	5	3	4	3	3	4	4	4	3	4	3	3	3	3	2	3	3	2	3	4	4	4	4
89	Condition3	4	1	2	1																	1993	4		1	4	4	3	3	5	5	5	5	5	5	5	5	5	5	5	5	1	1	1	4	4	4	1	1
90	Condition3	5		2	1			1	1			1			1	1						1986	3		1	5	5	3	3	5	5	5	5	4	5	4	5	5	5	5	5	1	1	1	5	5	5	1	1
91	Condition3	5		2	1										1		1					1988	4		2	3	3	3	3	3	3	3	3	3	3	3	3	3	3	3	3	3	3	3	5	5	5	3	3
92	Condition3	5	1	2	1			1				1	1		1							1993	4		2	5	5	3	3	5	5	5	5	2	3	3	3	5	4	5	5	1	1	1	3	3	3	1	1
93	Condition3	5		1	1			1	1						1	1						1990	4		2	3	4	3	3	4	4	5	4	4	4	4	4	4	4	4	4	2	2	2	5	5	5	1	1
94	Condition3	4		2	1							1			1							2000	2		2	5	5	3	3	5	5	5	5	4	3	3	3	5	5	5	5	1	1	1	5	5	5	1	1
95	Condition3	5		2	1			1	1	1					1							1969	3		2	5	5	3	3	5	5	4	5	4	4	3	4	5	5	5	5	1	1	1	5	5	5	1	1
96	Condition3	5		2	1				1													1978	4		2	4	4	3	3	4	4	5	5	3	3	3	3	5	5	5	5	1	1	1	5	5	5	1	1
97	Condition3	6	1	2	1			1	1	1					1	1						2000	2		2	4	4	2	2	4	4	5	5	2	2	3	3	4	4	4	4	2	2	2	5	5	5	2	2
98	Condition3	5		2	1				1						1			1				1999	4		2	5	5	3	3	5	5	5	4	4	5	5	4	5	5	5	5	1	1	1	4	4	4	1	1
99	Condition3	4		1	1							1			1	1						1980	4		2	5	5	4	4	4	4	4	4	4	4	3	3	4	4	3	4	3	3	3	4	4	4	3	3
100	Condition3	5	1	2	1			1				1		1	1		1					1979	4		2	5	4	5	4	5	5	4	5	4	4	1	1	5	5	5	5	1	1	1	5	5	5	1	1
101	Condition3	4	1	2	1			1				1	1									1990	6	Post Grado	2	5	5	3	3	5	5	4	5	4	4	4	4	5	5	5	5	1	1	1	5	5	5	1	1
102	Condition3	5		1											1	1		1				1978	4		2	5	5	3	3	5	5	5	5	4	4	4	4	5	5	5	5	1	1	1	5	5	5	2	2
103	Condition3	4		2	1																	1997	2		2	3	4	3	3	5	5	5	5	3	3	4	4	5	5	1	2	1	1	1	5	5	5	1	1
104	Condition3	5		2	1			1	1	1					1							1994	3		2	4	4	4	4	5	5	5	5	4	4	4	4	4	4	5	5	1	3	1	5	5	5	1	1
105	Condition3	5		2									1		1					1	Cojinova	1967	3		2	5	5	5	5	5	5	5	5	5	5	5	5	5	5	5	5	1	1	1	5	5	5	1	1
106	Condition3	4		1											1	1				1	Pampanito	1967	4		2	5	5	3	3	5	5	5	5	1	1	1	1	5	5	5	5	1	1	1	5	5	5	1	1
107	Condition3	5		2	1				1						1	1	1					1988	3		2	4	4	3	3	4	4	4	4	3	3	3	3	4	4	4	4	4	2	1	4	3	4	1	1
108	Condition3	5		2								1	1		1	1		1		1	Reineta, robalo, charela	1972	6	Maestria	2	5	5	4	4	5	5	4	4	5	4	3	3	4	4	5	5	2	2	1	5	5	5	1	1
109	Condition4	5		2	1																	2000	3		1	5	5	5	5	5	5	5	5	5	5	5	5	5	5	5	5	1	1	1	5	5	5	1	1
110	Condition4	6	1	2				1	1				1		1							1992	4		1	5	5	3	3	5	5	5	5	3	3	3	3	5	5	5	5	1	1	1	5	5	5	1	1
111	Condition4	4	1	1	1	1		1	1	1					1							1992	2		1	5	5	4	4	5	3	3	4	3	3	3	3	4	3	3	3	2	2	2	5	5	5	3	3
112	Condition4	5		2	1			1	1					1								1985	3		1	5	5	5	5	2	2	5	5	3	3	4	5	5	5	5	5	1	1	1	5	5	5	1	1
113	Condition4	6	1	2	1			1	1						1	1		1				1979	4		1	5	5	3	3	5	5	5	5	4	4	4	4	5	5	5	5	1	1	1	5	5	5	1	1
114	Condition4	5		2											1	1						1977	4		1	5	5	4	4	3	3	3	3	3	3	3	3	5	5	5	5	1	1	1	5	5	5	1	1
115	Condition4	6		2	1				1						1							1988	4		1	5	5	5	5	5	4	5	5	4	4	5	5	5	5	5	5	1	1	1	4	4	4	1	5
116	Condition4	5		1	1										1	1						1971	4		1	5	5	5	5	5	5	5	5	5	5	5	5	4	4	4	4	1	2	1	5	5	5	1	1
117	Condition4	6	1	2	1				1				1		1	1						1992	4		1	5	5	3	3	5	4	5	5	2	3	4	5	4	5	4	4	2	2	2	5	5	3	2	1
118	Condition4	6		2	1			1		1		1	1		1							1999	2		1	4	4	3	3	5	4	5	5	4	4	3	2	4	5	5	5	2	2	1	5	5	5	1	1
119	Condition4	5		2									1		1	1	1	1				1977	6	ingenieria no culminada	1	5	5	3	3	5	5	4	5	3	3	3	3	5	5	5	4	1	1	1	5	5	5	1	1
120	Condition4	5	1	2	1			1	1	1		1			1							1997	4		1	5	5	2	2	4	2	3	3	2	2	2	2	4	5	4	3	2	2	2	4	4	4	2	2
121	Condition4	5		2	1				1						1							1997	3		1	4	4	4	4	5	5	5	5	5	5	5	5	5	5	5	5	1	1	1	5	5	5	5	5
122	Condition4	6	1	2	1			1	1	1		1		1	1	1		1				1994	4		1	5	5	5	5	5	5	5	5	5	5	5	5	5	5	5	5	2	2	2	5	5	5	1	1
123	Condition4	5	1	2	1			1									1	1				1992	4		1	3	4	4	4	5	4	4	4	4	4	4	4	4	5	5	5	1	1	1	4	4	4	1	1
124	Condition4	5		2	1			1							1							1983	4		1	5	5	5	5	5	5	4	4	5	5	5	5	5	5	5	5	1	1	1	5	5	5	1	1
125	Condition4	4		2	1				1					1								1978	4		1	5	5	4	4	5	4	5	5	5	5	5	4	5	5	5	5	1	1	1	5	5	5	1	1
126	Condition4	4		2	1										1							1990	2		2	5	5	3	3	3	3	3	4	3	3	3	3	3	3	4	4	2	2	2	5	5	5	2	2
127	Condition4	5		2	1																	1995	4		2	1	3	3	3	5	5	5	5	2	2	3	3	3	3	3	3	4	4	4	4	4	4	5	5
128	Condition4	5	1	1	1			1	1	1			1		1	1	1		1			1983	4		2	5	5	4	4	4	3	4	4	4	4	4	4	5	4	4	4	1	1	1	5	5	5	3	3
129	Condition4	5		2	1			1	1	1			1				1	1				1988	4		2	3	4	4	4	4	4	4	4	4	4	4	4	4	4	4	4	2	2	2	2	2	2	1	1
130	Condition4	5		2					1						1							1996	2		2	5	5	1	1	5	5	5	5	5	5	5	5	5	5	5	5	1	1	1	5	5	5	1	1
131	Condition4	5		1	1				1						1	1	1					1980	3		2	5	5	5	4	4	4	5	5	5	5	5	5	5	4	5	4	1	1	2	5	5	5	3	2
132	Condition4	5		2	1			1	1				1		1	1	1	1				1992	4		2	5	5	5	5	3	2	4	4	5	5	4	4	5	5	5	4	1	1	1	5	5	5	1	1
133	Condition4	5		1	1		1		1						1		1	1				1984	4		2	5	5	4	4	5	5	5	5	4	4	4	4	5	5	5	5	1	1	1	5	5	5	2	2
134	Condition4	5		1	1			1							1	1						1984	2		2	5	3	3	3	4	4	3	4	4	4	3	3	4	4	4	3	1	1	1	4	4	4	1	1
135	Condition4	6		1	1			1	1	1		1			1	1		1				1986	4		2	5	5	5	5	5	5	5	5	5	5	5	5	5	5	5	5	1	1	1	5	5	5	1	1
136	Condition4	5	1	2	1					1					1			1				1988	4		2	5	5	4	4	5	5	4	5	3	4	3	4	5	4	5	4	2	2	2	5	5	5	4	1
137	Condition4	5		1	1				1				1		1	1						1982	3		2	5	5	5	5	5	5	5	5	5	5	5	5	5	5	5	5	1	1	1	5	5	5	1	1
138	Condition4	6		2								1			1		1	1		1	Trucha	1992	4		2	5	5	4	4	5	5	5	5	5	5	5	5	5	5	5	5	1	1	1	5	5	5	1	1
139	Condition4	6		2	1																	1980	4		2	5	5	4	4	3	4	5	5	3	4	5	4	4	4	5	5	1	1	1	4	4	5	3	2
140	Condition4	5		1					1						1							1979	4		2	5	5	2	2	5	4	5	5	4	4	2	2	4	4	4	4	1	2	1	5	5	5	1	1
141	Condition4	5		1	1				1						1			1		1	ojo de uva, perico	1978	3		2	5	5	3	3	4	4	5	5	5	5	3	3	5	5	5	5	1	1	1	5	5	5	1	1
142	Condition4	5	1	2	1				1			1			1			1				1984	3		2	5	5	5	5	5	4	5	5	5	5	5	5	5	5	5	5	1	1	1	5	5	5	1	1
143	Condition4	4		2											1							1997	4		2	5	5	2	2	4	4	5	5	4	5	5	5	5	5	5	5	2	2	2	5	5	5	1	2
144	Condition5a	5		2	1			1	1						1							1988	4		1	5	4	5	4	3	5	5	4	5	5	4	4	1	2	5	3	2	2	1	4	4	4	1	2
145	Condition5a	5		2				1	1						1							1992	6	licenciatura	1	5	5	5	5	5	5	5	5	5	5	5	5	5	5	5	5	1	1	1	5	5	5	1	1
146	Condition5a	5		2	1										1	1						1988	2		1	5	5	5	5	5	5	5	5	5	5	5	5	5	5	5	5	1	1	1	5	5	5	1	1
147	Condition5a	5		2	1			1		1			1		1			1				1982	4		1	5	5	5	5	5	5	5	4	4	4	4	4	5	5	5	5	1	1	1	5	5	5	1	1
148	Condition5a	4		2											1					1	basa	1977	4		1	5	5	5	5	5	5	5	5	4	4	4	4	5	5	5	5	1	1	1	4	4	4	4	4
149	Condition5a	6		2	1				1						1							1998	4		1	5	5	5	5	5	5	4	5	4	4	4	4	5	5	5	5	1	1	2	5	5	4	1	1
150	Condition5a	5		2	1			1							1			1				1991	4		1	5	4	5	5	4	4	2	2	4	2	2	2	2	1	1	2	2	3	2	5	4	4	1	1
151	Condition5a	5		2	1																	1994	4		1	5	5	4	4	5	4	4	5	4	4	4	4	4	4	5	5	1	1	1	5	5	5	1	1
152	Condition5a	6		2	1			1							1		1	1				1985	4		2	5	5	5	5	5	5	5	5	5	5	5	5	5	5	5	5	1	1	1	5	5	5	1	1
153	Condition5a	6		1	1			1				1	1		1	1		1				1988	4		2	5	5	5	5	5	5	5	5	5	5	5	5	5	5	5	5	1	1	1	5	5	5	1	1
154	Condition5a	6		2	1			1	1				1			1	1					1966	6	instituto superior tecnico	2	5	5	5	5	5	5	5	5	5	5	5	5	5	5	5	5	1	1	1	5	5	5	1	1
155	Condition5a	6	1	2	1			1	1	1	1	1	1	1	1	1	1					1992	4		2	5	5	5	5	5	5	5	5	4	5	4	5	5	5	5	5	1	1	1	5	5	5	1	1
156	Condition5a	5		2	1				1						1	1				1		1989	4		2	5	5	5	5	4	4	4	5	3	4	4	5	5	4	4	5	1	1	1	4	4	5	2	1
157	Condition5a	6		2	1				1						1					1	pampanito, merluza	1985	3		2	5	5	5	5	5	5	4	5	5	5	5	5	5	5	5	5	1	1	1	5	5	5	1	1
158	Condition5a	5		2	1			1	1	1												1989	3		2	5	5	5	5	5	5	5	5	5	5	5	5	5	5	5	5	1	1	1	5	5	5	1	1
159	Condition5a	6	1	2	1			1							1			1				1983	3		2	1	1	1	1	1	1	1	1	1	1	1	1	1	3	3	1	1	1	1	5	5	5	1	1
160	Condition5a	5	1	2	1			1	1						1							1995	4		2	5	5	4	4	5	4	4	5	4	4	2	4	4	3	4	4	1	2	2	5	5	5	2	2
161	Condition5b	6	1	2	1			1	1	1		1	1		1	1	1	1				1980	4		1	5	5	5	5	5	5	5	5	5	5	5	5	5	5	5	5	1	1	1	5	5	5	1	1
162	Condition5b	6	1	1	1			1	1	1			1		1			1				1988	2		1	5	4	5	5	5	4	5	4	5	4	4	5	5	4	5	5	1	1	1	5	5	5	1	1
163	Condition5b	5		1	1									1	1							1976	3		1	5	5	5	5	5	5	5	5	1	5	5	5	5	3	5	5	1	1	1	5	5	5	1	1
164	Condition5b	6	1	2	1			1	1			1			1	1						1989	4		1	5	5	5	5	5	5	5	5	5	5	5	5	5	5	5	5	1	1	1	5	5	5	1	1
165	Condition5b	4	1	2	1			1	1			1	1		1	1	1					1991	4		1	5	5	5	5	5	4	5	5	5	5	5	5	5	5	4	5	1	1	1	5	4	5	1	1
166	Condition5b	5	1	2	1				1						1					1	Pejerrey	1995	3		1	5	5	4	5	5	4	4	5	4	5	4	5	5	5	5	5	1	1	1	5	5	5	1	1
167	Condition5b	4	1	1											1							1988	4		1	5	5	5	5	5	5	5	5	5	5	5	5	5	5	5	5	1	1	1	5	5	5	1	1
168	Condition5b	5		2	1				1	1					1	1						1988	4		1	5	4	4	4	4	4	5	4	4	5	3	4	5	4	4	4	2	2	2	5	5	5	2	2
169	Condition5b	6		1											1	1		1				1989	4		2	5	5	5	5	4	5	4	5	5	5	5	5	4	4	5	5	1	1	1	5	5	5	1	1
170	Condition5b	5		2	1																	1999	2		2	5	5	5	5	5	5	5	5	3	5	5	5	5	5	5	5	2	2	5	4	2	5	1	1
171	Condition5b	6	1	2	1			1	1		1				1	1	1					1989	4		2	5	5	5	5	5	5	5	5	5	5	5	5	5	5	5	5	1	1	1	5	5	5	1	1
172	Condition5b	4		2	1			1				1			1							1977	4		2	5	5	5	5	5	5	5	5	5	5	5	5	5	5	5	5	1	1	1	4	4	4	1	1
173	Condition5b	4		2	1										1							2000	4		2	5	5	5	5	5	5	5	5	5	5	5	5	5	5	5	5	1	1	1	5	5	5	1	1
174	Condition5b	5		1		1									1		1	1				1977	4		2	5	5	5	5	5	5	5	5	5	5	5	5	5	5	5	5	1	1	1	5	5	5	1	1
175	Condition5b	6	1	1	1		1	1	1						1	1	1	1				1992	4		2	5	5	5	5	5	5	5	5	5	4	4	4	5	5	5	5	1	1	1	5	5	5	1	1
176	Condition5b	6		1	1				1						1							1993	3		2	5	5	5	4	5	5	4	5	4	5	5	5	5	5	5	5	1	1	1	5	5	5	1	1
177	Condition5b	5		2	1			1				1			1			1				1977	3		2	5	5	5	5	5	5	5	5	5	5	5	5	5	5	5	5	1	1	1	5	5	5	1	1
178	Condition5b	5		2	1			1	1						1							1991	4		2	5	5	5	5	5	5	5	5	5	5	5	5	5	5	4	5	1	1	1	5	5	5	1	1
179	Condition6	6		2	1			1	1	1						1						1983	4		1	5	5	5	5	1	1	1	1	5	5	5	5	1	1	1	1	1	1	1	5	5	5	1	1
180	Condition6	5	1	2	1								1		1							1996	4		1	5	5	5	5	4	4	4	4	5	5	5	5	3	3	4	4	1	1	2	5	5	5	1	1
181	Condition6	4		2	1				1													1994	4		1	5	5	4	4	5	5	5	5	5	5	4	4	4	4	5	5	1	1	1	5	5	5	1	1
182	Condition6	5		2	1			1	1		1		1		1							1989	3		1	5	5	5	5	3	2	1	1	5	5	1	5	1	1	4	2	1	1	1	4	4	4	1	1
183	Condition6	5	1	2	1			1	1	1					1	1						1997	4		1	5	5	5	4	3	4	4	5	5	5	5	5	3	3	4	5	1	1	1	5	5	5	1	1
184	Condition6	6	1	2	1			1	1				1		1	1	1					1981	6	licenciatura	1	5	5	5	5	4	4	5	5	5	5	5	5	5	5	5	5	1	1	1	5	5	5	1	1
185	Condition6	5	1	2	1					1					1							1985	3		1	5	5	5	5	3	2	4	4	5	5	5	5	5	5	5	5	1	1	1	5	5	5	1	1
186	Condition6	6	1	2	1			1	1						1							1983	4		1	5	5	5	5	3	4	4	4	5	5	5	5	4	4	4	4	1	1	1	5	5	5	1	1
187	Condition6	5		2	1				1						1							1983	4		1	5	5	5	5	5	5	4	4	5	5	4	5	5	4	5	5	1	1	1	5	5	5	5	1
188	Condition6	6	1	2	1			1							1							1992	4		1	4	3	3	4	4	4	5	5	5	4	5	4	5	4	5	5	3	3	5	3	2	3	4	3
189	Condition6	6	1	2	1			1				1	1		1					1	pejerrey	1997	4		1	5	5	5	5	5	5	5	5	4	4	4	4	5	5	5	5	1	1	1	5	5	5	1	1
190	Condition6	6		2					1													1980	3		1	5	5	3	3	4	4	5	5	3	3	3	3	3	4	5	5	1	3	1	5	5	5	2	1
191	Condition6	5		2	1			1	1						1							1981	4		1	5	5	5	5	4	4	4	5	5	5	5	5	5	5	5	5	1	1	1	5	5	5	1	1
192	Condition6	4	1	2	1			1	1	1							1					1999	2		1	5	5	5	5	3	3	5	4	5	5	5	5	5	3	5	5	1	1	1	5	5	5	1	1
193	Condition6	5		2	1				1	1			1		1							1985	4		1	5	5	4	4	5	2	2	4	2	2	2	2	4	1	4	3	1	3	3	5	5	3	2	1
194	Condition6	5	1	2				1	1	1		1	1		1	1		1				1991	4		1	5	5	5	5	4	3	5	5	5	5	5	4	5	5	5	5	1	1	1	5	5	5	2	1
195	Condition6	5	1	2	1			1	1						1			1				1954	4		1	1	1	4	4	2	4	2	2	4	3	2	3	3	2	3	2	2	2	3	5	5	5	3	2
196	Condition6	6		2					1								1					1995	3		1	5	5	3	2	5	4	4	5	4	4	3	3	4	4	5	3	5	5	5	5	5	4	4	4
197	Condition6	5		2	1										1	1						1954	4		1	5	5	5	5	5	5	5	5	5	5	5	5	5	5	5	5	1	1	1	5	5	5	1	1
198	Condition6	5	1	2	1			1	1						1		1					1998	4		2	5	5	5	5	4	4	4	4	5	5	5	5	5	5	5	5	1	1	1	5	5	5	1	1
199	Condition6	5		2	1				1	1												1995	4		2	5	5	5	5	5	5	5	5	5	5	5	5	5	5	5	5	1	1	1	5	5	5	1	1
200	Condition6	6		2				1					1		1							1968	4		2	5	5	4	4	3	3	3	4	4	4	4	4	2	2	4	3	2	2	2	5	5	5	2	2
201	Condition6	4		2	1										1							1986	4		2	5	5	5	5	5	5	5	5	5	5	5	5	5	5	5	5	1	1	1	5	5	5	1	1
202	Condition6	6		2	1			1	1	1		1			1	1	1	1				1987	4		2	5	5	5	5	4	4	5	5	5	5	5	5	5	5	5	5	1	1	1	5	5	5	1	1
203	Condition6	4		2						1												1996	2		2	3	2	4	2	5	5	5	5	5	5	5	5	5	5	5	5	1	1	1	4	5	5	1	1
204	Condition6	5		1	1													1				1990	4		2	5	5	4	4	5	5	5	5	3	3	3	3	5	5	5	5	1	1	1	5	5	5	5	1
205	Condition6	4		1			1								1			1				1978	4		2	5	5	4	4	5	5	3	5	4	4	4	5	5	5	5	5	1	1	1	4	4	4	1	1
206	Condition6	4		1											1							1994	4		2	4	3	3	3	4	3	3	3	3	3	3	3	3	3	3	3	3	3	3	4	5	3	3	3
207	Condition6	5		2	1					1					1					1	picuda	1971	4		2	5	5	5	5	5	5	3	3	5	5	5	5	5	5	5	5	1	1	1	5	5	5	1	1
208	Condition6	5		2	1			1	1						1	1	1	1				1998	4		2	5	5	5	5	5	5	4	5	5	5	4	5	5	5	5	4	2	1	2	5	5	5	1	1
209	Condition6	6		2	1				1						1							1995	3		2	5	5	5	5	5	5	5	5	4	4	3	2	4	4	5	5	1	1	1	2	2	4	2	1
210	Condition6	5	1	1			1						1		1	1	1					1986	4		2	5	5	4	5	3	3	3	4	2	5	1	5	3	3	5	3	2	2	2	5	5	5	2	1
211	Condition6	6		2	1			1	1	1					1	1	1	1				1984	4		2	5	5	5	5	4	4	3	4	5	5	5	5	4	4	5	3	1	1	1	5	5	5	1	1
212	Condition6	4		2									1		1	1				1	trucha	1966	4		2	5	5	5	5	5	5	5	5	5	5	5	5	5	5	5	5	1	1	1	5	5	5	1	1
213	Condition6	4	1	2	1										1	1	1					1987	4		2	5	4	4	4	3	2	4	4	1	1	2	2	3	2	3	4	1	1	1	5	5	5	1	1
214	Condition7	5	1	2	1				1						1							1980	4		1	5	5	4	4	5	5	5	5	5	5	4	4	5	5	4	5	2	2	2	5	5	5	1	3
215	Condition7	5	1	2	1			1							1		1					1989	4		1	4	4	3	3	5	4	5	5	3	2	3	3	4	4	4	4	2	2	2	4	4	4	2	2
216	Condition7	5		2	1										1		1	1				1999	2		1	5	5	3	3	5	5	5	5	3	2	3	2	5	5	5	5	1	1	1	3	3	3	1	1
217	Condition7	4		2				1												1	Pejerrell	1982	4		1	3	3	4	4	3	5	4	4	5	5	3	3	3	1	3	4	2	2	3	4	4	3	3	2
218	Condition7	6		2	1			1	1						1					1	pejerrey	1994	3		1	5	5	5	5	5	5	5	5	5	3	3	3	5	5	5	5	1	1	1	5	5	5	1	1
219	Condition7	4		1	1										1		1					1990	4		1	3	3	1	2	4	4	4	4	3	3	2	2	3	3	4	4	2	2	2	3	3	3	2	2
220	Condition7	4	1	2	1			1				1	1				1					1993	2		1	5	5	5	5	5	5	5	5	5	5	5	5	5	5	5	5	1	1	1	4	4	4	1	1
221	Condition7	4	1	2	1										1	1	1					1993	4		1	5	5	1	1	4	4	5	5	1	1	4	4	5	1	5	5	2	2	1	4	5	5	2	2
222	Condition7	6	1	2	1			1	1		1	1			1	1						1991	4		1	5	5	4	4	5	5	5	5	5	5	4	5	5	5	5	5	1	1	1	5	5	5	1	1
223	Condition7	5	1	2				1	1					1	1	1						1984	4		1	5	4	4	4	4	4	4	4	4	4	4	4	4	4	4	4	2	2	2	4	4	4	2	2
224	Condition7	5		2	1			1	1						1	1						1970	3		1	5	5	3	2	4	4	5	4	5	5	3	3	5	5	5	5	1	1	1	5	5	5	1	1
225	Condition7	5		2	1			1								1		1				1981	4		1	5	5	3	3	5	5	5	5	3	3	3	3	5	5	5	5	1	1	1	5	5	5	1	1
226	Condition7	4		2	1									1				1				1976	4		1	5	5	5	5	5	5	5	5	5	5	4	5	4	5	4	5	1	1	1	4	5	5	1	1
227	Condition7	6	1	2	1			1	1						1	1						1999	2		1	4	4	4	4	4	4	5	4	3	3	3	3	4	4	4	5	1	1	1	5	5	4	1	1
228	Condition7	5		2	1			1		1		1	1	1	1	1	1					1997	4		1	4	4	3	3	5	5	5	5	4	4	4	5	5	5	5	5	1	2	1	5	5	4	1	1
229	Condition7	5		2	1																	1997	2		1	3	2	5	4	5	4	4	4	2	3	1	2	3	4	3	2	2	3	3	2	4	4	2	2
230	Condition7	4		1	1			1				1	1		1		1					1982	4		1	5	5	3	3	2	2	3	3	3	3	3	3	2	4	4	2	3	3	3	5	4	4	2	2
231	Condition7	5	1	1	1								1									1980	4		1	5	5	3	3	3	3	4	5	3	3	3	3	5	3	5	5	5	5	5	5	5	5	4	4
232	Condition7	6		1	1							1	1	1		1						1980	4		1	3	2	2	2	3	4	4	4	4	5	4	4	3	5	5	5	2	2	3	5	5	5	1	2
233	Condition7	6	1	1	1		1		1				1				1					1992	4		1	3	4	2	2	2	2	2	4	1	1	4	2	4	4	4	3	2	2	2	4	4	4	3	4
234	Condition7	6	1	2	1										1		1					1998	4		2	5	5	5	5	5	5	5	5	5	5	5	5	5	5	5	5	1	1	1	5	5	5	1	1
235	Condition7	5	1	2	1			1							1					1	perico	1982	6	Post Grado	2	5	5	3	3	5	5	5	5	3	3	3	3	5	3	5	5	1	1	1	5	5	5	1	1
236	Condition7	4	1	2	1										1	1						1994	4		2	5	5	3	3	5	4	5	5	3	3	3	3	4	5	4	4	2	3	2	4	5	4	1	1
237	Condition7	4		2	1			1	1	1						1						1998	4		2	5	5	4	4	5	5	5	5	4	4	4	4	5	5	5	5	1	1	1	5	5	5	1	1
238	Condition7	4		2	1				1						1							1995	4		2	5	5	3	3	5	4	5	5	4	3	4	4	5	5	4	5	1	1	1	5	5	5	1	1
239	Condition7	6		1	1	1		1				1			1							1999	2		2	5	5	4	4	5	5	5	5	5	5	5	5	5	5	5	5	1	1	1	5	5	5	1	1
240	Condition7	5	1	2					1	1												1996	4		2	5	5	3	4	5	5	5	5	4	4	4	4	5	5	5	5	1	1	1	5	5	5	1	1
241	Condition7	6	1	1	1			1	1	1	1	1	1	1	1	1	1	1		1	pejerrey	1992	4		2	4	5	5	4	5	5	5	5	2	1	2	2	5	5	5	5	1	3	3	5	5	5	1	1
242	Condition7	5		2	1				1						1							1982	3		2	5	5	5	5	3	5	4	4	3	3	5	5	3	4	5	3	3	3	3	2	2	2	3	3
243	Condition7	5		2	1								1					1				1985	4		2	5	5	5	5	5	5	5	5	1	5	1	5	5	5	5	1	1	2	1	5	5	5	1	1
244	Condition7	6	1	2	1			1	1			1	1		1	1						1995	4		2	5	5	3	3	5	5	1	1	1	1	1	1	5	5	5	5	1	1	1	5	5	5	1	1
245	Condition7	4		2	1				1						1	1				1	Ojo de uva, pez espada	1992	4		2	5	5	3	3	4	4	4	4	4	4	5	4	4	4	4	4	2	2	3	2	2	2	2	2
246	Condition7	6		2															1	1		1989	3		2	5	5	5	5	5	4	5	5	4	4	5	5	5	5	4	4	1	1	1	5	5	5	1	1
247	Condition7	6		2	1											1						1990	4		2	4	4	4	3	5	5	4	5	4	4	3	3	5	4	4	4	1	1	1	5	5	4	2	1
248	Condition7	4		2	1			1							1	1	1					2000	4		2	5	5	4	4	5	5	5	5	5	5	5	4	5	5	5	5	1	1	1	5	5	5	1	1
249	Condition7	5		2	1			1	1	1					1							1994	4		2	4	5	2	2	4	5	3	4	3	2	2	2	4	4	4	4	2	2	3	5	5	4	1	1
250	Condition7	5		1	1			1	1	1			1		1							1977	4		2	5	5	5	5	3	5	5	5	5	5	5	5	5	5	5	5	1	1	1	5	5	5	1	1
251	Condition8	5	1	1								1	1		1		1	1				1999	4		1	5	5	3	3	5	5	5	5	3	3	4	4	5	5	5	5	1	1	1	3	3	3	2	2
252	Condition8	5		2					1									1				2000	2		1	3	3	3	3	1	4	5	5	3	3	3	3	1	2	4	5	1	1	1	2	2	2	4	1
253	Condition8	6	1	2	1			1					1		1	1	1			1	Trucha, Carachi	1984	4		1	5	5	5	5	3	4	4	4	5	5	5	5	3	4	4	4	2	2	2	4	4	4	1	1
254	Condition8	5		2	1										1							1979	4		1	5	5	3	3	5	5	4	5	3	3	3	3	4	4	5	5	1	1	1	5	5	5	5	1
255	Condition8	4		1	1				1													1999	4		1	4	4	3	3	4	2	3	2	2	3	3	2	3	2	3	2	4	4	4	5	5	5	5	4
256	Condition8	5		2	1																	1982	2		1	5	5	4	4	5	5	4	5	1	1	1	1	4	4	4	4	2	4	4	5	5	5	3	3
257	Condition8	5		2	1				1						1			1				1975	4		1	5	5	3	3	3	4	3	4	4	4	3	3	4	4	5	4	3	3	3	5	5	5	3	3
258	Condition8	4		2	1										1		1					1994	3		1	5	5	5	5	4	4	4	4	5	5	5	5	5	4	4	4	2	2	2	4	4	4	1	1
259	Condition8	6	1	1	1		1	1	1			1	1		1	1	1	1				1994	4		1	4	4	3	4	4	3	3	3	3	3	4	3	4	5	4	3	4	4	3	3	3	4	3	3
260	Condition8	5	1	1	1		1	1	1	1					1	1						1992	4		1	5	5	3	3	5	4	3	3	4	4	3	3	4	3	3	3	2	2	2	5	5	5	2	2
261	Condition8	6		1	1	1	1		1				1									1993	4		1	5	5	2	2	3	5	3	3	4	4	4	4	5	4	4	3	3	3	3	5	5	5	3	3
262	Condition8	5	1	1	1			1	1	1		1								1	perico	1991	4		1	4	5	5	5	4	5	4	5	4	4	4	4	4	5	4	5	3	3	3	4	4	4	3	4
263	Condition8	4	1	2	1			1														1990	4		1	4	3	3	3	4	3	4	4	3	3	4	4	4	3	5	4	3	2	2	4	4	5	3	4
264	Condition8	6		2					1	1		1	1									1987	3		1	5	4	3	3	3	4	2	3	3	3	2	3	2	2	2	4	3	3	3	4	4	4	4	3
265	Condition8	4	1	2	1			1							1	1						1978	2		1	5	5	4	4	4	5	4	4	4	2	2	3	4	4	5	4	1	1	2	5	5	4	1	2
266	Condition8	5	1	2	1					1					1	1						1986	4		1	5	5	4	4	4	4	4	4	4	4	3	3	4	5	4	3	2	2	2	5	5	5	1	2
267	Condition8	6	1	2	1			1	1		1		1		1	1	1					1990	4		1	5	5	3	3	4	3	3	3	4	4	4	4	4	4	4	4	4	4	4	4	4	4	4	5
268	Condition8	6	1	1	1			1	1	1		1	1	1	1	1	1	1				1989	4		2	5	5	4	3	3	4	3	4	4	3	4	5	3	4	3	2	3	3	2	4	5	5	2	2
269	Condition8	5		1											1	1	1					2000	3		2	5	5	4	4	5	5	3	5	5	5	5	5	5	5	5	5	1	1	1	4	4	5	1	1
270	Condition8	5		2	1				1	1			1		1	1						1990	4		2	5	5	3	3	3	4	4	4	4	4	3	3	5	5	5	5	1	1	1	5	5	5	1	1
271	Condition8	6		2	1				1			1	1		1							1993	4		2	5	5	3	3	3	3	3	4	2	3	3	3	3	3	3	3	3	3	3	3	3	3	3	3
272	Condition8	4		2						1			1		1			1				1996	4		2	4	4	4	3	4	4	5	5	3	3	4	4	3	3	5	5	1	1	1	4	3	3	1	1
273	Condition8	6		2	1																	1990	4		2	3	4	4	4	4	5	5	4	4	4	4	4	3	4	5	4	5	1	1	1	3	3	1	1
274	Condition8	6	1	1	1			1	1				1		1	1		1				1991	4		2	5	5	3	3	4	4	2	4	3	3	3	3	4	4	3	2	3	3	3	4	4	3	3	3
275	Condition8	6		2	1			1	1											1	Pampanito	1996	3		2	5	5	3	3	5	5	3	4	3	2	2	2	4	2	2	2	4	4	4	5	5	5	4	4
276	Condition8	4		1				1		1		1	1		1							1993	4		2	5	5	4	4	5	5	5	5	3	3	3	3	4	3	5	5	1	1	1	3	3	3	1	1
277	Condition8	6	1	2	1			1												1	merluza	1992	4		2	4	5	3	3	3	3	1	1	4	4	1	1	1	1	3	3	1	1	1	5	5	5	1	1
278	Condition8	6	1	2	1			1	1						1	1						1994	4		2	5	5	3	3	4	4	3	3	3	3	3	3	4	3	4	4	2	2	2	2	2	2	3	3
279	Condition8	5	1	2				1							1			1		1	Palometa	1993	4		2	5	5	3	3	4	4	2	2	3	3	3	3	4	4	4	3	2	2	1	5	5	5	1	1
280	Condition8	6	1	1	1	1		1				1	1	1	1	1	1	1		1	trucha	1969	3		2	5	5	3	3	5	5	5	5	5	5	3	3	5	5	5	5	1	1	1	5	5	5	5	1
281	Condition8	4	1	2											1							1986	4		2	5	5	3	3	5	5	5	5	3	3	3	3	4	4	4	4	1	1	1	5	5	5	1	1
282	Condition8	6		1				1	1				1		1		1			1	Cachema	1983	4		2	5	5	3	3	2	4	3	4	3	3	3	3	4	4	4	3	3	3	3	4	4	4	3	2
283	Condition8	6	1	2	1				1						1	1	1					2000	3		2	3	4	3	3	5	5	5	5	5	5	4	5	5	5	5	5	1	1	1	5	5	5	1	1
284	Condition8	5	1	2	1				1						1	1						1984	4		2	5	5	3	2	4	4	2	2	3	3	2	3	3	4	3	3	3	3	3	3	3	3	3	3
285	Condition8	6		1											1					1	Cojinova, merluza	1964	3		2	5	5	4	4	3	4	4	5	2	2	2	2	4	4	4	4	3	4	3	2	2	3	3	4
[truncated: 2 more columns]
